# Supplementary material for: Characteristics of the Intestinal Flora of TPOAb-Positive Women With Subclinical Hypothyroidism in the Second Trimester of Pregnancy: A Single-Center Prospective Cohort Study
Source: PubMed Central journal article supplement (PMC9160305; doi:10.3389/fcimb.2022.794170), 2022-05-19
Supplement: DataSheet_1.pdf [file DataSheet_1.pdf]

**SUPPLEMENTARY TABLE 1 |  $\alpha$ -diversity indices**

| $\alpha$ -diversity index | A1_B1_p.value | A2_B2_p.value | A3_B3_p.value |
|---------------------------|---------------|---------------|---------------|
| Chao1                     | 0.302932      | 0.824078      | 0.280981      |
| ACE                       | 0.253648      | 0.895960      | 0.322671      |
| Shannon                   | 0.163888      | 0.410037      | 0.562498      |
| Simpson                   | 0.147673      | 0.373889      | 0.823735      |

A1, TPOAb-positive women with SCH and no LT<sub>4</sub>; A2, TPOAb-positive women with SCH and low-dose LT<sub>4</sub>; A3, TPOAb-positive women with SCH and high-dose LT<sub>4</sub>; B1, TPOAb-negative women with SCH and no LT<sub>4</sub>; B2, TPOAb-negative women with SCH and low-dose LT<sub>4</sub>; B3, TPOAb-negative women with SCH and high-dose LT<sub>4</sub>. P<0.05 was considered a statistically significant difference.

**SUPPLEMENTARY TABLE 2 | Principal coordinate analysis (PCoA1) conducted with the unweighted unfrac algorithm**

| Group1 | Group2 | p.value         |
|--------|--------|-----------------|
| A1     | B1     | 0.066123        |
| A2     | B2     | 0.353178        |
| A3     | B3     | <b>0.046936</b> |

A1, TPOAb-positive women with SCH and no LT<sub>4</sub>; A2, TPOAb-positive women with SCH and low-dose LT<sub>4</sub>; A3, TPOAb-positive women with SCH and high-dose LT<sub>4</sub>; B1, TPOAb-negative women with SCH and no LT<sub>4</sub>; B2, TPOAb-negative women with SCH and low-dose LT<sub>4</sub>; B3, TPOAb-negative women with SCH and high-dose LT<sub>4</sub>. P<0.05 was considered a statistically significant difference.

**SUPPLEMENTARY TABLE 3 | Principal coordinate analysis (PCoA2) conducted with the unweighted unfrac algorithm**

| Group1 | Group2 | p.value  |
|--------|--------|----------|
| A1     | B1     | 0.676214 |
| A2     | B2     | 0.694837 |
| A3     | B3     | 0.950269 |

A1, TPOAb-positive women with SCH and no LT<sub>4</sub>; A2, TPOAb-positive women with SCH and low-dose LT<sub>4</sub>; A3, TPOAb-positive women with SCH and high-dose LT<sub>4</sub>; B1, TPOAb-negative women with SCH and no LT<sub>4</sub>; B2, TPOAb-negative women with SCH and low-dose LT<sub>4</sub>; B3, TPOAb-negative women with SCH and high-dose LT<sub>4</sub>. P<0.05 was considered a statistically significant difference.

**SUPPLEMENTARY TABLE 4** | LEfSe analysis of differential species abundance between A1 and B1, A2 and B2, A3 and B3

| Feature                                                                                                                                                                     | log(max) | Group | LDA      | p.value         |
|-----------------------------------------------------------------------------------------------------------------------------------------------------------------------------|----------|-------|----------|-----------------|
| D_0__Bacteria.D_1__Firmicutes.D_2__Clostridia.D_3__Clostridiales.D_4__Ruminococcaceae.D_5__Subdoligranulum                                                                  | 4.923682 | A1    | 4.331077 | <b>0.005844</b> |
| D_0__Bacteria.D_1__Proteobacteria.D_2__Gammaproteobacteria.D_3__Betaproteobacteriales.D_4__Burkholderiaceae.D_5__Parasutterella.D_6__unculturedbacterium                    | 4.566440 | A1    | 4.252338 | <b>0.007091</b> |
| D_0__Bacteria.D_1__Firmicutes.D_2__Negativicutes.D_3__Selenomonadales.D_4__Acidaminococcaceae.D_5__Phascolarctobacterium.D_6__Ruminococcussp_N15_MGS_57                     | 4.654793 | B2    | 4.115964 | <b>0.010950</b> |
| D_0__Bacteria.D_1__Firmicutes.D_2__Erysipelotrichia.D_3__Erysipelotrichales.D_4__Erysipelotrichaceae.D_5__ErysipelotrichaceaeUCG_003.D_6__unculturedbacterium               | 4.750695 | B3    | 4.090399 | <b>0.026209</b> |
| D_0__Bacteria.D_1__Bacteroidetes.D_2__Bacteroidia.D_3__Bacteroidales.D_4__Bacteroidaceae.D_5__Bacteroides.D_6__BacteroidesmassiliensisB84634_Timon_e84634_DSM17679_JCM13223 | 4.763444 | B3    | 4.467702 | <b>0.047958</b> |

A1, TPOAb-positive women with SCH and no LT<sub>4</sub>; A2, TPOAb-positive women with SCH and low-dose LT<sub>4</sub>; A3, TPOAb-positive women with SCH and high-dose LT<sub>4</sub>; B1, TPOAb-negative women with SCH and no LT<sub>4</sub>; B2, TPOAb-negative women with SCH and low-dose LT<sub>4</sub>; B3, TPOAb-negative women with SCH and high-dose LT<sub>4</sub>. P<0.05 was considered a statistically significant difference.

**SUPPLEMENTARY TABLE 5** | LefSe analysis of differential functional abundance between A1 and B1, A2 and B2, A3 and B3 based on the KEGG pathway map

| Feature                                                | log(max) | Group | LDA      | p.value         |
|--------------------------------------------------------|----------|-------|----------|-----------------|
| Tropane__piperidine_and_pyridine_alkaloid_biosynthesis | 3.508286 | B1    | 2.565456 | <b>0.043572</b> |
| Chlorocyclohexane_and_chlorobenzene_degradation        | 2.788096 | A1    | 2.055611 | <b>0.025922</b> |
| Histidine_metabolism                                   | 4.163966 | A1    | 2.451475 | <b>0.010422</b> |
| Penicillin_and_cephalosporin_biosynthesis              | 2.769174 | A1    | 2.200494 | <b>0.012217</b> |
| D_Arginine_and_D_ornithine_metabolism                  | 2.673901 | B1    | 2.091290 | <b>0.039367</b> |
| Streptomycin_biosynthesis                              | 4.275319 | A1    | 2.626528 | <b>0.011288</b> |
| Homologous_recombination                               | 4.215960 | B2    | 2.360865 | <b>0.038818</b> |
| Carotenoid_biosynthesis                                | 1.211411 | A2    | 2.559018 | <b>0.020485</b> |
| D_Glutamine_and_D_glutamate_metabolism                 | 4.365393 | B2    | 2.528276 | <b>0.038818</b> |
| One_carbon_pool_by_folate                              | 4.280245 | B2    | 2.423856 | <b>0.009621</b> |
| Purine_metabolism                                      | 3.962793 | B2    | 2.022170 | <b>0.049821</b> |
| Alanine__aspartate_and_glutamate_metabolism            | 4.296429 | B2    | 2.424944 | <b>0.013955</b> |
| Dioxin_degradation                                     | 3.132483 | A2    | 2.595310 | <b>0.013505</b> |
| Meiosis__yeast                                         | 0.203853 | B3    | 2.776641 | <b>0.010314</b> |
| One_carbon_pool_by_folate                              | 4.272409 | A3    | 2.356438 | <b>0.033218</b> |
| Linoleic_acid_metabolism                               | 3.317597 | B3    | 2.907936 | <b>0.001589</b> |
| Plant_hormone_signal_transduction                      | 0.250116 | B3    | 2.498385 | <b>0.033757</b> |
| Biosynthesis_of_vancomycin_group_antibiotics           | 4.361532 | A3    | 2.892761 | <b>0.025329</b> |
| Streptomycin_biosynthesis                              | 4.261760 | A3    | 2.600646 | <b>0.013587</b> |

A1, TPOAb-positive women with SCH and no LT<sub>4</sub>; A2, TPOAb-positive women with SCH and low-dose LT<sub>4</sub>; A3, TPOAb-positive women with SCH and high-dose LT<sub>4</sub>; B1, TPOAb-negative women with SCH and no LT<sub>4</sub>; B2, TPOAb-negative women with SCH and low-dose LT<sub>4</sub>; B3, TPOAb-negative women with SCH and high-dose LT<sub>4</sub>. P<0.05 was considered a statistically significant difference.

**SUPPLEMENTARY TABLE 6** | Differential abundance analysis of taxonomy *Bacteroides massiliensis* B84634\_Timone84634\_DSM17679\_JCM13223 between A3 and B3

| Sample name | Group | p.value         |
|-------------|-------|-----------------|
| A402483     |       |                 |
| A656520     |       |                 |
| A889338     |       |                 |
| A717492     |       |                 |
| A044884     |       |                 |
| A062082     | A3    |                 |
| A686193     |       |                 |
| A723787     |       |                 |
| A188358     |       |                 |
| A793168     |       |                 |
| A174676     |       | <b>0.037506</b> |
| A427765     |       |                 |
| B025335     |       |                 |
| B823300     |       |                 |
| B948489     |       |                 |
| B640212     |       |                 |
| B370055     | B3    |                 |
| B862461     |       |                 |
| B007742     |       |                 |
| B421431     |       |                 |
| B681296     |       |                 |

Sample name only lists the sample that can annotate *Bacteroides massiliensis* B84634\_Timone84634\_DSM17679\_JCM13223; A3, TPOAb-positive women with SCH and high-dose LT4; B3, TPOAb-negative women with SCH and high-dose LT4. P<0.05 was considered a statistically significant difference.
