# Supplementary material for: Characteristics of the Intestinal Flora of TPOAb-Positive Women With Subclinical Hypothyroidism in the Second Trimester of Pregnancy: A Single-Center Prospective Cohort Study
Source: PubMed Central journal article supplement (PMC9160305; doi:10.3389/fcimb.2022.794170), 2022-05-19
Supplement: DataSheet_3.pdf [file DataSheet_3.pdf]

A

## Genus

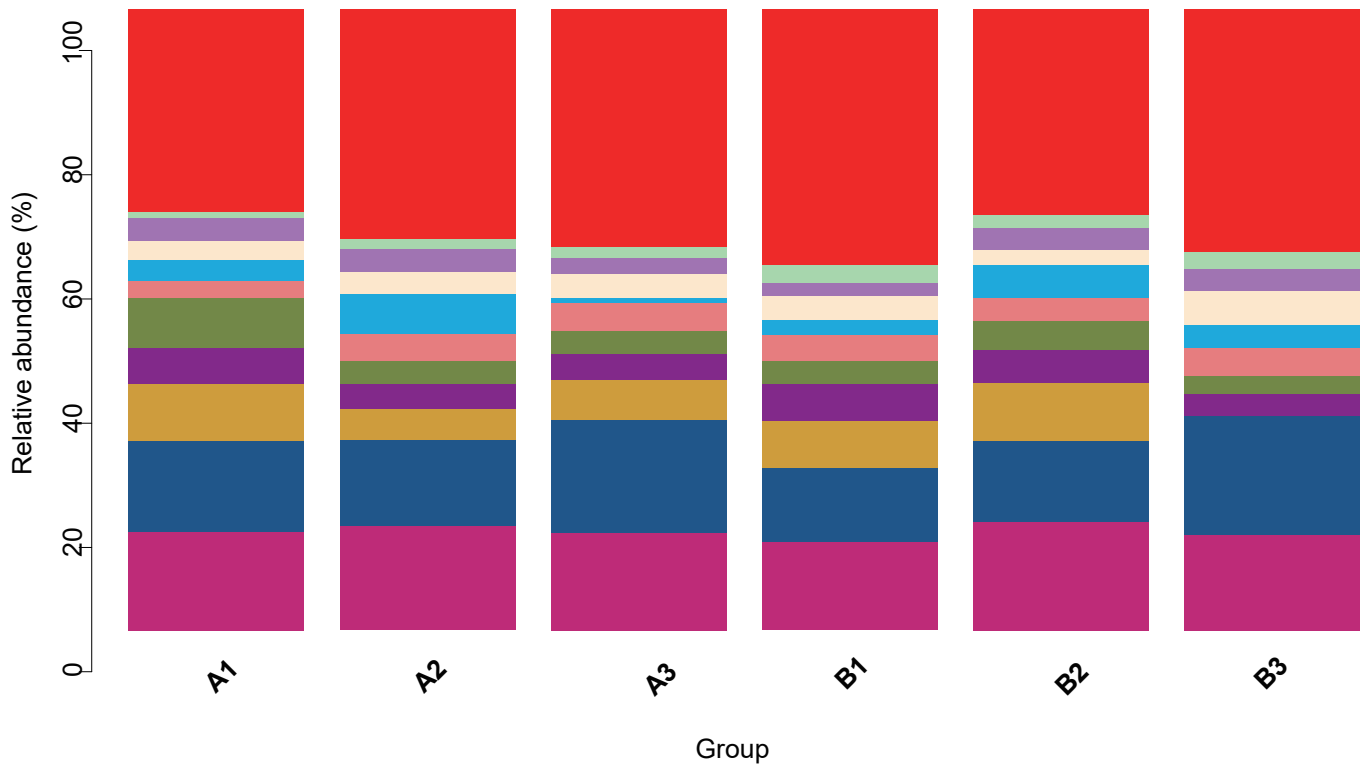

B

## Species

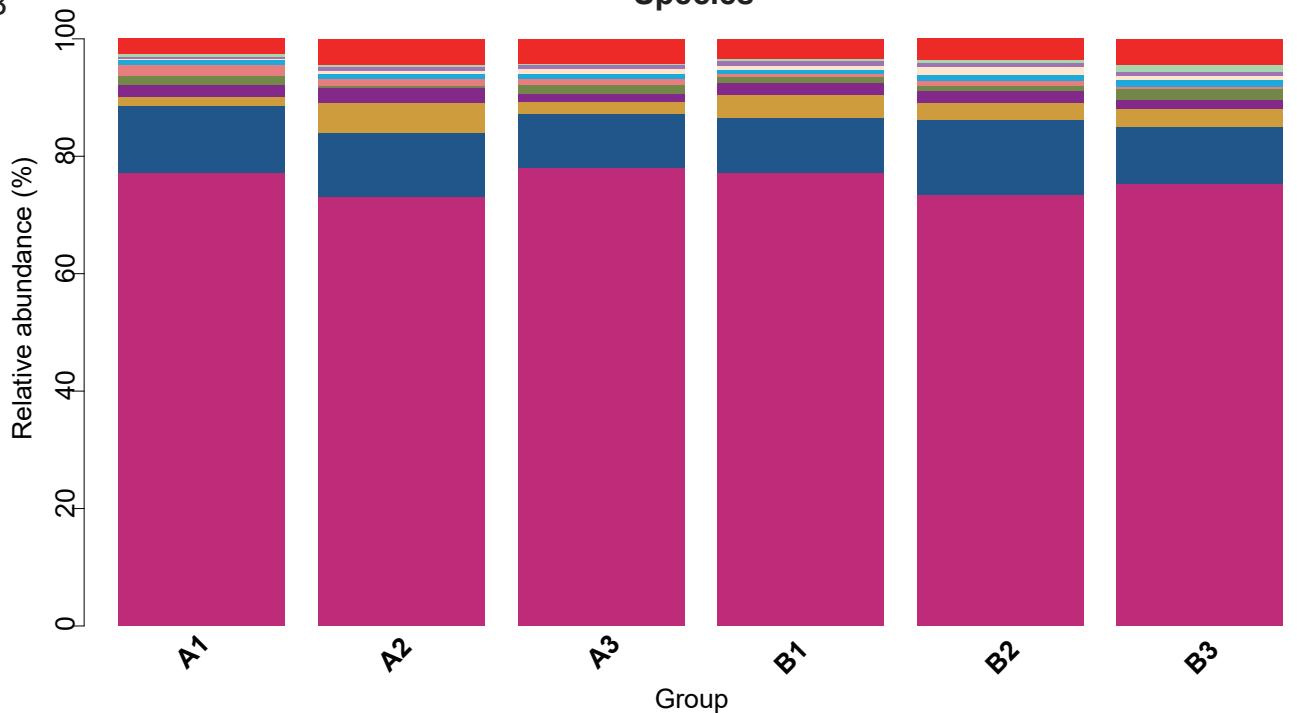

**SUPPLEMENTARY FIGURE 2** | (A) Differential abundance of taxonomy *Subdoligranulum* in the six subgroups at the genus level; (B) Differential abundance of taxonomy *Ruminococcus* sp. N15\_MGS\_57 in the six subgroups at the species level.
